# Supplementary material for: Plant Sterol-Poor Diet Is Associated with Pro-Inflammatory Lipid Mediators in the Murine Brain
Source: Int J Mol Sci. 2021 Dec 8;22(24):13207. doi: 10.3390/ijms222413207 (PMC8707069; doi:10.3390/ijms222413207)
Supplement: Supplementary file 1 [file ijms-22-13207-s001.zip]

Archive with 20 entries (20 files):
- 20211207_Supplementary Material_MRe.pdf
- Figure S1 HF+SC sterols.pptx
- Figure S10 experimental design.pptx
- Figure S2 body weight.pptx
- Figure S3 FC sterols.pptx
- Figure S4 obob sterols+eicos_brain_liver.pptx
- Figure S5 SC+HF eicos.pptx
- Figure S6 correlation CA+SI-PGD2_TxB2_SC.pptx
- Figure S7 Ptgds-Txbas1 4-24W.pptx
- Figure S8 Western blot lipid rafts.pptx
- Figure S9 Microglia Aktivierung PS.pptx
- Table S1 food composition of diet-lots.xlsx
- Table S2 sterols SC.xlsx
- Table S3 sterol ratios SC.xlsx
- Table S4 correlation PS_sterols.xlsx
- Table S5 sterols HF+SC.xlsx
- Table S6 sterol ratios HF+SC.xlsx
- Table S7 obob sterol+eicos.xlsx
- Table S8 eicos SC.xlsx
- Table S9 eicos HF+SC.xlsx
