# Supplementary material for: Plant Sterol-Poor Diet Is Associated with Pro-Inflammatory Lipid Mediators in the Murine Brain
Source: Int J Mol Sci. 2021 Dec 8;22(24):13207. doi: 10.3390/ijms222413207 (PMC8707069; doi:10.3390/ijms222413207)
Supplement: Supplementary file 1 [file ijms-22-13207-s001.zip › Table S1 food composition of diet-lots.xlsx]

## Sheet: diet
Table S1. Food composition of different lots of standard chow (SC) and coconut oil-based high-fat (HF) diet. Data are expressed as mean±SD. Statistics: one- and two-way ANOVA with p<0.05*, p<0.01**, p<0.001***, p<0.0001****; not significant (ns); limit of detection (LOD); plant sterol (PS); hydroxyoctadecadienoic acid (HODE).
SC diet	concentration in different lots of V1124-300 (ssniff Spezialdiaeten)
	1			2			3			Mean±SD			one-way ANOVA (Lot)		two-way ANOVA (SC vs. HFD)
Brassicasterol [µg/g]	3.4	±	0.2	3.3	±	0.3	3.4	±	0.3	3.4	±	0.1	ns		< 0.0001	****
Campesterol [µg/g]	42.7	±	2.1	49.4	±	2.6	44.6	±	0.7	45.5	±	2.8	< 0.0001	****	< 0.0001	****
Stigmasterol [µg/g]	34.6	±	1.6	39	±	2.1	36.5	±	1.3	36.7	±	1.8	< 0.0001	****	< 0.0001	****
Sitosterol [µg/g]	122	±	4	151	±	9	130	±	4	135	±	12	< 0.0001	****	< 0.0001	****
total PS [µg/g]	203.18	±	5.05	243.15	±	11.99	214.37	±	5.05	220.233	±	16.8362	< 0.0001	****	< 0.0001	****
Lanosterol [µg/g]	3.1	±	0.2	4	±	0.3	2.9	±	0.3	3.3	±	0.5	< 0.0001	****	ns
Desmosterol [µg/g]	< LOD			< LOD			< LOD			< LOD			-		-
Cholesterol [µg/g]	< LOD			< LOD			< LOD			< LOD			-		-
Linoleic acid [pg/g]	8719	±	298	13078	±	448	11727	±	1512	11174	±	1822	0.0087	**	< 0.0001	****
13-HODE [pg/g]	6036	±	871	8755	±	768	31072	±	5393	15288	±	11216	< 0.0001	****	0.0021	**
9-HODE [pg/g]	7995	±	1180	11831	±	1187	24066	±	2419	14631	±	6853	< 0.0001	****	< 0.0001	****
HF diet	concentration in different lots of E15772-340 (ssniff Spezialdiaeten)
	1			2			3			Mean±SD			one-way ANOVA (Lot)
Brassicasterol [µg/g]	2.1	±	0.7	2.1	±	0.4	< LOD			2.1	±	0	-
Campesterol [µg/g]	13	±	4.5	14.6	±	0.9	6.9	±	0.3	11.5	±	3.3	0.004	**
Stigmasterol [µg/g]	21.6	±	2.2	30.7	±	2.4	15.7	±	1	22.7	±	6.2	< 0.0001	****
Sitosterol [µg/g]	45.6	±	5	62.6	±	3.2	41	±	1.7	49.7	±	9.3	< 0.0001	****
total PS [µg/g]	82.22	±	8.07	109.95	±	5.7	63.55	±	1.87	85.24	±	19.0627	< 0.0001	****
Lanosterol [µg/g]	1.9	±	0.2	4.6	±	0.4	2.1	±	0.4	2.9	±	1.2	< 0.0001	****
Desmosterol [µg/g]	5.2	±	1.7	< LOD			< LOD			5.2	±	0	-
Cholesterol [µg/g]	125	±	33	< LOD			< LOD			125	±	0	-
Linoleic acid [pg/g]	10.7	±	1.2	13.7	±	0.5	126	±	33	50.1	±	53.7	0.0014	**
13-HODE [pg/g]	8	±	0.8	11	±	0	59	±	3.7	26	±	23.4	< 0.0001	****
9-HODE [pg/g]	12.3	±	0.5	14	±	0.8	64.3	±	6.5	30.2	±	24.1	< 0.0001	****
