# Supplementary material for: Plant Sterol-Poor Diet Is Associated with Pro-Inflammatory Lipid Mediators in the Murine Brain
Source: Int J Mol Sci. 2021 Dec 8;22(24):13207. doi: 10.3390/ijms222413207 (PMC8707069; doi:10.3390/ijms222413207)
Supplement: Supplementary file 1 [file ijms-22-13207-s001.zip › Table S2 sterols SC.xlsx]

## Sheet: Sterols control
Table S2. Sterol composition across brain regions (cortex, cerebellum, hippocampus, hypothalamus), liver and plasma from male C57BL/6J mice fed a standard chow diet (SC). Data are expressed as mean±SD. Statistics: one-way ANOVA with p<0.05*, p<0.01**, p<0.001***, p<0.0001****; not significant (ns); plant sterol (PS).
Analyte	age	diet	Cortex			Cerebellum			Hippocampus			Hypothalamus			Liver			Plasma			statistical effects (brain)
Campesterol§	12	SC	13.5	±	0.7	14.7	±	1.8	10.2	±	1.3	16.2	±	1.3	25	±	3.7	4.1	±	0.1	0.0107	*
	20	SC	12.1	±	0.3	19.6	±	1.1	14	±	2.1	18.9	±	1.4	19.1	±	2	3.5	±	0.3	0.0012	**
	32	SC	11.6	±	0.3	19.9	±	0.8	14.1	±	0.1	21.3	±	0.7	19	±	3.1	3.9	±	0.1	< 0.0001	****
	34	SC	11.3	±	0.3	21.9	±	1.7	13.4	±	1	21.5	±	1.2	22.6	±	3.2	4	±	0.2	< 0.0001	****
	36	SC	16.5	±	1	25.6	±	2.1	12.4	±	0.8	21.7	±	1.6	18.2	±	1.8	3.4	±	0.2	< 0.0001	****
	44	SC	19.2	±	1.6	26.2	±	0.5	18.1	±	0.4	27.4	±	1.8	24.2	±	2.2	4	±	0.1	0.0001	***
	statistical effects (age)		< 0.0001 ****			< 0.0001 ****			0.0004 ***			< 0.0001 ****			0.1112 ns			0.014 *
Stigmasterol§	12	SC	7.9	±	0.2	4.6	±	0.4	4.5	±	0.6	5.1	±	0.3	< LOD			0.09	±	0	< 0.0001	****
	20	SC	6.3	±	0.8	1.2	±	0.4	1.9	±	0.5	2.4	±	0.7	< LOD			0.11	±	0.04	0.0001	***
	32	SC	6.9	±	0.3	2.8	±	0.2	3.3	±	0.2	3.4	±	0.4	< LOD			0.09	±	0	< 0.0001	****
	34	SC	7.5	±	0.3	5	±	0	4.9	±	0.2	5	±	0.6	< LOD			0.12	±	0.01	0.0002	***
	36	SC	8	±	1.3	4	±	0.6	3.4	±	0.1	3.3	±	0.3	< LOD			0.1	±	0.01	0.0006	***
	44	SC	8.1	±	0.4	3.6	±	0.1	5.4	±	0.1	4.1	±	0.8	< LOD			0.13	±	0.01	< 0.0001	****
	statistical effects (age)		0.1031 ns			< 0.0001 ****			< 0.0001 ****			0.0021 **			-			0.2187 ns
Sitosterol§	12	SC	2.5	±	0.3	2.6	±	0.2	1.8	±	0	3	±	0.2	7.8	±	1.3	1.6	±	0.1	0.0034	**
	20	SC	1.6	±	0.1	2.3	±	0.2	2.3	±	0.5	3.3	±	0.5	5.6	±	0.3	1.7	±	0.3	0.012	*
	32	SC	1.2	±	0.1	2.2	±	0.1	1.7	±	0.2	2.6	±	0.4	5.8	±	1.4	1.4	±	0	0.0009	***
	34	SC	2.6	±	0	4.1	±	0.2	3	±	0.1	4.5	±	0.4	7	±	0.6	1.4	±	0.1	0.0005	***
	36	SC	2.7	±	0.7	5.4	±	0.1	2.4	±	0.1	4	±	0.4	7.4	±	0.5	1.6	±	0.3	0.0004	***
	44	SC	3	±	0.4	3.6	±	0.2	3.3	±	0.3	5.2	±	0.4	7.3	±	0.9	1.4	±	0	0.0007	***
	statistical effects (age)		0.0043 **			< 0.0001 ****			0.0004 ***			0.0001 ***			0.1385 ns			0.5345 ns
Brassicasterol§	12	SC	2.38667	±	0.0974109	1.28667	±	0.2585	1.32667	±	0.22529	1.42333	±	0.221711	< LOD			0.04	±	0.01	0.0022	**
	20	SC	3.60667	±	0.400028	2.71	±	0.275802	2.75667	±	0.0873053	2.34667	±	0.236972	< LOD			0.065	±	0.005	0.01	**
	32	SC	2.91333	±	0.0873053	1.73	±	0.110454	2.05667	±	0.136951	1.73	±	0.125698	< LOD			0.045	±	0.005	< 0.0001	****
	34	SC	2.01333	±	0.53897	0.245	±	0.005	0.96	±	0.337441	0.966667	±	0.177451	< LOD			0.0266667	±	0.0169967	0.0148	*
	36	SC	3.33667	±	0.498085	1.95333	±	0.0736357	1.71667	±	0.165798	1.58333	±	0.306848	< LOD			0.0466667	±	0.00471405	0.0015	**
	44	SC	2.62667	±	0.282882	1.11	±	0.231517	1.73667	±	0.0590668	1.12667	±	0.0910433	< LOD			0.0466667	±	0.0169967	0.0001	***
	statistical effects (age)		0.0082 **			< 0.0001 ****			< 0.0001 ****			0.0003 ***			-			0.2557 ns
total PS§	12	SC	26.22	±	0.93	23.2	±	2.3	17.81	±	1.39	25.69	±	1.67	32.83	±	4.91	5.87	±	0.2	0.0034	**
	20	SC	23.57	±	0.85	25.81	±	0.59	20.96	±	3.06	26.96	±	2.25	24.63	±	1.89	5.3	±	0.08	0.0643	ns
	32	SC	22.5	±	0.4	26.55	±	0.66	21.12	±	0.3	29.06	±	0.99	24.73	±	4.48	5.41	±	0.08	< 0.0001	****
	34	SC	22.51	±	1.82	31.18	±	1.9	22.26	±	0.71	31.96	±	2.15	29.64	±	3.73	5.53	±	0.31	0.0006	***
	36	SC	30.52	±	2.23	36.92	±	2.74	19.92	±	0.93	30.61	±	2.39	25.6	±	2.23	5.12	±	0.37	0.0004	***
	44	SC	32.93	±	2.52	34.5	±	0.64	28.62	±	0.56	37.82	±	2.82	31.49	±	2.99	5.51	±	0.04	0.0093	**
	statistical effects (age)		0.0001 ***			< 0.0001 ****			0.0002 ***			0.0014 **			0.8553 ns			0.3891 ns
Lanosterol§	12	SC	3.2	±	0	2.2	±	0.3	1.8	±	0.2	2.2	±	0	1.1	±	0.2	0.06	±	0	0.0003	***
	20	SC	3.1	±	0.2	1.7	±	0.2	1.5	±	0.2	1.6	±	0.1	1.1	±	0.2	0.08	±	0.01	< 0.0001	****
	32	SC	2.9	±	0.1	1	±	0.1	1.5	±	0.1	1.5	±	0.1	1.1	±	0.3	0.07	±	0	< 0.0001	****
	34	SC	2.2	±	0.2	1.2	±	0.1	1.1	±	0.1	2	±	0.7	0.9	±	0.1	0.08	±	0	0.0421	*
	36	SC	3.5	±	0.5	2.2	±	0.6	1	±	0.1	1	±	0.2	1.2	±	0.2	0.08	±	0	0.0008	***
	44	SC	3.6	±	0.1	1.8	±	0.1	2	±	0.1	1.9	±	0.1	2.2	±	0.4	0.1	±	0	< 0.0001	****
	statistical effects (age)		0.0022 **			0.0067 **			< 0.0001 ****			0.0238 *			0.0013 **			0.0002 ***
Desmosterol§	12	SC	47.9	±	1.2	35.7	±	4.6	54.6	±	7	63.4	±	4	1.1	±	0.1	0.26	±	0.01	0.0022	**
	20	SC	58.9	±	4.8	38.2	±	0.7	58.8	±	7.6	70.7	±	3.4	1.2	±	0.2	0.26	±	0.02	0.001	**
	32	SC	51.5	±	1.9	23.2	±	0.5	43.4	±	0.9	54.9	±	3	0.7	±	0.2	0.31	±	0.01	< 0.0001	****
	34	SC	46.2	±	4.2	22.8	±	4.5	34.4	±	1.5	53.9	±	3	1.1	±	0.1	0.24	±	0.02	< 0.0001	****
	36	SC	69.7	±	8.1	44.2	±	2	42.1	±	1.5	61.2	±	8.2	0.8	±	0.1	0.25	±	0.03	0.0041	**
	44	SC	39.9	±	1.3	28.2	±	1.4	45.8	±	1.8	56.6	±	2.8	1.7	±	0.4	0.32	±	0.02	< 0.0001	****
	statistical effects (age)		0.0003 ***			< 0.0001 ****			0.0014 **			0.0229 *			0.0047 **			0.0107 *
Cholesterol§	12	SC	8840	±	480	10883	±	1496	7907	±	1258	12867	±	953	1073	±	107	167	±	8	0.009	**
	20	SC	11133	±	573	13867	±	634	12533	±	1255	16233	±	419	1009	±	93	154	±	6	0.0012	**
	32	SC	8950	±	696	9387	±	160	9773	±	180	12967	±	544	1061	±	160	192	±	3	< 0.0001	****
	34	SC	10567	±	368	12433	±	249	10900	±	535	16000	±	535	1037	±	9	207	±	17	< 0.0001	****
	36	SC	13767	±	919	17017	±	881	11100	±	308	13583	±	1547	1107	±	42	165	±	6	0.0029	**
	44	SC	11967	±	47	11667	±	309	9753	±	405	13267	±	450	1193	±	116	166	±	9	< 0.0001	****
	statistical effects (age)		< 0.0001 ****			< 0.0001 ****			0.0017 **			0.0033 **			0.5579 ns			0.0078 **
§	[ng/mg Tissue / µg/mL Plasma]

## Sheet: additional statistics
Bonferroni's multiple comparisons test (p-values)
campesterol	cortex	cerebellum	hippocampus	hypothalamus	brain	liver	plasma	circulation
12 vs. 20	>0.9999	0.0818	0.0802	0.963	0.0224	0.8002	0.1672	>0.9999
12 vs. 32	0.6233	0.0557	0.076	0.0375	0.0046	0.7501	>0.9999	>0.9999
12 vs. 34	0.3472	0.0044	0.2149	0.03	0.0019	>0.9999	>0.9999	>0.9999
12 vs. 36	0.0544	<0.0001	>0.9999	0.0225	<0.0001	0.4543	0.0623	>0.9999
12 vs. 44	0.0003	<0.0001	0.0002	<0.0001	<0.0001	>0.9999	>0.9999	>0.9999
20 vs. 32	>0.9999	>0.9999	>0.9999	>0.9999	>0.9999	>0.9999	>0.9999	>0.9999
20 vs. 34	>0.9999	>0.9999	>0.9999	>0.9999	>0.9999	>0.9999	0.2149	>0.9999
20 vs. 36	0.0029	0.0184	>0.9999	0.9423	0.0074	>0.9999	>0.9999	>0.9999
20 vs. 44	<0.0001	0.009	0.052	0.0007	<0.0001	>0.9999	0.3868	0.8191
32 vs. 34	>0.9999	>0.9999	>0.9999	>0.9999	>0.9999	>0.9999	>0.9999	>0.9999
32 vs. 36	0.0011	0.0267	>0.9999	>0.9999	0.0369	>0.9999	0.5433	>0.9999
32 vs. 44	<0.0001	0.013	0.0548	0.0115	<0.0001	>0.9999	>0.9999	0.8973
34 vs. 36	0.0007	0.3756	>0.9999	>0.9999	0.0999	>0.9999	0.0687	>0.9999
34 vs. 44	<0.0001	0.1773	0.0199	0.0143	<0.0001	>0.9999	>0.9999	>0.9999
36 vs. 44	0.0983	>0.9999	0.0042	0.0189	0.001	0.7665	0.1292	0.9294
stigmasterol	cortex	cerebellum	hippocampus	hypothalamus	brain	liver	plasma	circulation
12 vs. 20	0.5194	<0.0001	0.0001	0.0046	<0.0001	-	>0.9999	>0.9999
12 vs. 32	>0.9999	0.0025	0.0796	0.1126	0.0044	-	>0.9999	>0.9999
12 vs. 34	>0.9999	>0.9999	>0.9999	>0.9999	>0.9999	-	>0.9999	>0.9999
12 vs. 36	>0.9999	>0.9999	0.119	0.094	0.1613	-	>0.9999	>0.9999
12 vs. 44	>0.9999	0.1657	0.3645	>0.9999	>0.9999	-	0.8688	0.8688
20 vs. 32	>0.9999	0.0119	0.0239	>0.9999	0.0295	-	>0.9999	>0.9999
20 vs. 34	>0.9999	<0.0001	<0.0001	0.0075	<0.0001	-	>0.9999	>0.9999
20 vs. 36	0.3784	<0.0001	0.0162	>0.9999	0.001	-	>0.9999	>0.9999
20 vs. 44	0.2509	0.0003	<0.0001	0.126	<0.0001	-	>0.9999	>0.9999
32 vs. 34	>0.9999	0.0005	0.0137	0.1959	0.0037	-	>0.9999	>0.9999
32 vs. 36	>0.9999	0.0758	>0.9999	>0.9999	0.9945	-	>0.9999	>0.9999
32 vs. 44	>0.9999	0.5328	0.001	>0.9999	0.0163	-	0.8688	0.8688
34 vs. 36	>0.9999	0.1599	0.0202	0.1635	0.1323	-	>0.9999	>0.9999
34 vs. 44	>0.9999	0.0231	>0.9999	>0.9999	>0.9999	-	>0.9999	>0.9999
36 vs. 44	>0.9999	>0.9999	0.0014	>0.9999	0.6599	-	>0.9999	>0.9999
sitosterol	cortex	cerebellum	hippocampus	hypothalamus	brain	liver	plasma	circulation
12 vs. 20	0.6976	>0.9999	>0.9999	>0.9999	>0.9999	0.4287	>0.9999	>0.9999
12 vs. 32	0.0796	0.8022	>0.9999	>0.9999	0.0872	0.6358	>0.9999	>0.9999
12 vs. 34	>0.9999	<0.0001	0.0118	0.0179	0.0021	>0.9999	>0.9999	>0.9999
12 vs. 36	>0.9999	<0.0001	0.6717	0.2592	0.0002	>0.9999	>0.9999	>0.9999
12 vs. 44	>0.9999	0.0022	0.0018	0.0009	<0.0001	>0.9999	>0.9999	>0.9999
20 vs. 32	>0.9999	>0.9999	0.7642	>0.9999	0.1985	>0.9999	>0.9999	>0.9999
20 vs. 34	0.6053	<0.0001	0.3564	0.0885	0.001	>0.9999	>0.9999	>0.9999
20 vs. 36	0.2376	<0.0001	>0.9999	>0.9999	<0.0001	0.9985	>0.9999	>0.9999
20 vs. 44	0.0784	0.0003	0.0444	0.0038	<0.0001	>0.9999	>0.9999	>0.9999
32 vs. 34	0.0866	<0.0001	0.007	0.0036	<0.0001	>0.9999	>0.9999	>0.9999
32 vs. 36	0.0278	<0.0001	0.3893	0.0454	<0.0001	>0.9999	>0.9999	>0.9999
32 vs. 44	0.0099	<0.0001	0.0011	0.0002	<0.0001	>0.9999	>0.9999	>0.9999
34 vs. 36	>0.9999	0.0002	0.7013	>0.9999	>0.9999	>0.9999	>0.9999	>0.9999
34 vs. 44	>0.9999	0.3809	>0.9999	>0.9999	0.3294	>0.9999	>0.9999	>0.9999
36 vs. 44	>0.9999	<0.0001	0.0879	0.1082	>0.9999	>0.9999	>0.9999	>0.9999
brassicasterol	cortex	cerebellum	hippocampus	hypothalamus	brain	liver	plasma	circulation
12 vs. 20	0.0867	0.0003	0.0001	0.0113	>0.9999	-	>0.9999	>0.9999
12 vs. 32	>0.9999	0.6922	0.0383	>0.9999	>0.9999	-	>0.9999	>0.9999
12 vs. 34	>0.9999	0.0094	>0.9999	0.7029	>0.9999	-	>0.9999	>0.9999
12 vs. 36	0.3429	0.0923	0.981	>0.9999	>0.9999	-	>0.9999	>0.9999
12 vs. 44	>0.9999	>0.9999	0.816	>0.9999	>0.9999	-	>0.9999	>0.9999
20 vs. 32	>0.9999	0.0064	0.0509	0.1688	>0.9999	-	>0.9999	>0.9999
20 vs. 34	0.0136	<0.0001	<0.0001	0.0003	0.3377	-	0.3377	0.3377
20 vs. 36	>0.9999	0.0416	0.0024	0.0453	>0.9999	-	>0.9999	>0.9999
20 vs. 44	0.2945	<0.0001	0.0028	0.0011	>0.9999	-	>0.9999	>0.9999
32 vs. 34	0.4413	0.0005	0.0015	0.0453	>0.9999	-	>0.9999	>0.9999
32 vs. 36	>0.9999	>0.9999	>0.9999	>0.9999	>0.9999	-	>0.9999	>0.9999
32 vs. 44	>0.9999	0.1406	>0.9999	0.1903	>0.9999	-	>0.9999	>0.9999
34 vs. 36	0.0514	0.0001	0.0298	0.1688	>0.9999	-	>0.9999	>0.9999
34 vs. 44	>0.9999	0.0358	0.0247	>0.9999	>0.9999	-	>0.9999	>0.9999
36 vs. 44	>0.9999	0.0197	>0.9999	0.7029	>0.9999	-	>0.9999	>0.9999
total PS	cortex	cerebellum	hippocampus	hypothalamus	brain	liver	plasma	circulation
12 vs. 20	>0.9999	>0.9999	0.8086	>0.9999	>0.9999	0.5944	>0.9999	>0.9999
12 vs. 32	0.6615	>0.9999	0.663	>0.9999	>0.9999	0.6244	>0.9999	>0.9999
12 vs. 34	0.6687	0.0082	0.1604	0.1828	0.0147	>0.9999	>0.9999	>0.9999
12 vs. 36	0.3473	<0.0001	>0.9999	0.589	0.0002	0.9673	0.359	>0.9999
12 vs. 44	0.0236	0.0004	0.0001	0.0015	<0.0001	>0.9999	>0.9999	>0.9999
20 vs. 32	>0.9999	>0.9999	>0.9999	>0.9999	>0.9999	>0.9999	>0.9999	>0.9999
20 vs. 34	>0.9999	0.1289	>0.9999	0.5501	0.1473	>0.9999	>0.9999	>0.9999
20 vs. 36	0.0183	0.0004	>0.9999	>0.9999	0.001	>0.9999	>0.9999	>0.9999
20 vs. 44	0.0016	0.0041	0.0034	0.0039	<0.0001	>0.9999	>0.9999	0.9341
32 vs. 34	>0.9999	0.2857	>0.9999	>0.9999	0.4136	>0.9999	>0.9999	>0.9999
32 vs. 36	0.006	0.0008	>0.9999	>0.9999	0.0024	>0.9999	>0.9999	>0.9999
32 vs. 44	0.0006	0.0084	0.004	0.0214	<0.0001	>0.9999	>0.9999	>0.9999
34 vs. 36	0.006	0.086	>0.9999	>0.9999	0.1983	>0.9999	>0.9999	>0.9999
34 vs. 44	0.0006	>0.9999	0.0152	0.2615	0.0001	>0.9999	>0.9999	>0.9999
36 vs. 44	>0.9999	>0.9999	0.0011	0.0805	0.0093	>0.9999	>0.9999	>0.9999
lanosterol	cortex	cerebellum	hippocampus	hypothalamus	brain	liver	plasma	circulation
12 vs. 20	>0.9999	>0.9999	>0.9999	0.918	0.3315	>0.9999	0.1334	>0.9999
12 vs. 32	>0.9999	0.0313	0.5735	0.548	0.0098	>0.9999	0.8092	>0.9999
12 vs. 34	0.0546	0.0741	0.008	>0.9999	0.0037	>0.9999	0.0135	>0.9999
12 vs. 36	>0.9999	>0.9999	0.0009	0.0307	0.1614	>0.9999	0.0046	>0.9999
12 vs. 44	>0.9999	>0.9999	>0.9999	>0.9999	>0.9999	0.0097	0.0001	0.0069
20 vs. 32	>0.9999	0.8144	>0.9999	>0.9999	>0.9999	>0.9999	>0.9999	>0.9999
20 vs. 34	0.0628	>0.9999	0.2076	>0.9999	0.4099	>0.9999	>0.9999	>0.9999
20 vs. 36	>0.9999	>0.9999	0.0177	>0.9999	>0.9999	>0.9999	>0.9999	>0.9999
20 vs. 44	>0.9999	>0.9999	0.078	>0.9999	0.3791	0.0061	0.0078	0.0047
32 vs. 34	0.4166	>0.9999	0.5491	>0.9999	>0.9999	>0.9999	0.5724	>0.9999
32 vs. 36	0.3661	0.0274	0.0459	>0.9999	>0.9999	>0.9999	0.1533	>0.9999
32 vs. 44	0.2663	0.3249	0.0297	>0.9999	0.0111	0.0057	0.0017	0.0043
34 vs. 36	0.0041	0.0648	>0.9999	0.107	0.8281	>0.9999	>0.9999	>0.9999
34 vs. 44	0.0031	0.7669	0.0006	>0.9999	0.0042	0.0014	0.0216	0.0013
36 vs. 44	>0.9999	>0.9999	<0.0001	0.1976	0.1848	0.0111	0.0838	0.0109
desmosterol	cortex	cerebellum	hippocampus	hypothalamus	brain	liver	plasma	circulation
12 vs. 20	0.3805	>0.9999	>0.9999	>0.9999	0.008	>0.9999	>0.9999	>0.9999
12 vs. 32	>0.9999	0.012	0.3833	>0.9999	0.0029	>0.9999	>0.9999	>0.9999
12 vs. 34	>0.9999	0.0094	0.0088	0.8472	<0.0001	>0.9999	>0.9999	>0.9999
12 vs. 36	0.0044	0.1527	0.2211	>0.9999	0.1858	>0.9999	>0.9999	>0.9999
12 vs. 44	>0.9999	0.3223	>0.9999	>0.9999	0.0014	0.1853	0.2697	0.0812
20 vs. 32	>0.9999	0.0026	0.0637	0.0639	<0.0001	0.5057	>0.9999	0.9274
20 vs. 34	0.1841	0.0021	0.0018	0.0425	<0.0001	>0.9999	>0.9999	>0.9999
20 vs. 36	0.4381	0.8145	0.037	0.8584	>0.9999	0.9601	>0.9999	>0.9999
20 vs. 44	0.013	0.0595	0.1738	0.1307	<0.0001	0.3942	0.2697	0.1626
32 vs. 34	>0.9999	>0.9999	0.9021	>0.9999	0.1837	>0.9999	0.1376	>0.9999
32 vs. 36	0.0191	0.0001	>0.9999	>0.9999	<0.0001	>0.9999	0.3073	>0.9999
32 vs. 44	0.2947	>0.9999	>0.9999	>0.9999	>0.9999	0.0052	>0.9999	0.0041
34 vs. 36	0.0023	<0.0001	>0.9999	>0.9999	<0.0001	>0.9999	>0.9999	>0.9999
34 vs. 44	>0.9999	>0.9999	0.3378	>0.9999	0.434	0.174	0.0223	0.1323
36 vs. 44	0.0003	0.0015	>0.9999	>0.9999	<0.0001	0.0096	0.0507	0.0102
cholesterol	cortex	cerebellum	hippocampus	hypothalamus	brain	liver	plasma	circulation
12 vs. 20	0.0291	0.0345	0.0012	0.0267	<0.0001	>0.9999	>0.9999	>0.9999
12 vs. 32	>0.9999	>0.9999	0.5351	>0.9999	>0.9999	>0.9999	>0.9999	>0.9999
12 vs. 34	0.175	>0.9999	0.0384	0.0441	0.0003	>0.9999	0.1004	>0.9999
12 vs. 36	<0.0001	<0.0001	0.0243	>0.9999	<0.0001	>0.9999	>0.9999	>0.9999
12 vs. 44	0.0025	>0.9999	0.5604	>0.9999	0.0119	>0.9999	>0.9999	>0.9999
20 vs. 32	0.041	0.0013	0.066	0.0331	<0.0001	>0.9999	0.2154	>0.9999
20 vs. 34	>0.9999	>0.9999	0.9103	>0.9999	0.2432	>0.9999	0.0184	>0.9999
20 vs. 36	0.0103	0.0234	>0.9999	0.127	>0.9999	>0.9999	>0.9999	>0.9999
20 vs. 44	>0.9999	0.2231	0.063	0.0634	0.0037	>0.9999	>0.9999	0.9284
32 vs. 34	0.2487	0.0298	>0.9999	0.0548	0.0005	>0.9999	>0.9999	>0.9999
32 vs. 36	<0.0001	<0.0001	>0.9999	>0.9999	<0.0001	>0.9999	0.6925	>0.9999
32 vs. 44	0.0034	0.1842	>0.9999	>0.9999	0.025	>0.9999	0.7986	>0.9999
34 vs. 36	0.002	0.0011	>0.9999	0.2125	0.0254	>0.9999	0.0425	>0.9999
34 vs. 44	0.4942	>0.9999	>0.9999	0.1057	0.5544	>0.9999	0.0492	>0.9999
36 vs. 44	0.1384	0.0002	>0.9999	>0.9999	0.0005	>0.9999	>0.9999	>0.9999
