# Supplementary material for: Plant Sterol-Poor Diet Is Associated with Pro-Inflammatory Lipid Mediators in the Murine Brain
Source: Int J Mol Sci. 2021 Dec 8;22(24):13207. doi: 10.3390/ijms222413207 (PMC8707069; doi:10.3390/ijms222413207)
Supplement: Supplementary file 1 [file ijms-22-13207-s001.zip › Table S3 sterol ratios SC.xlsx]

## Sheet: Sterol ratios control
Table S3. Sterol ratios of brain regions (cortex, cerebellum, hippocampus, hypothalamus), liver and plasma from male C57BL/6J mice fed a standard chow diet (SC). Data are expressed as mean±SD. Statistics: one-way ANOVA with p<0.05*, p<0.01**, p<0.001***, p<0.0001****; not significant (ns).
Analyte	age	diet	Cortex			Cerebellum			Hippocampus			Hypothalamus			Liver			Plasma			statistical effects (brain)
Campesterol to Sitosterol	12	SC	5.5	±	0.4	5.7	±	0.2	5.7	±	0.6	5.4	±	0.7	3.2	±	0.2	2.5	±	0	0.9356	ns
	20	SC	7.5	±	0.8	8.5	±	1.1	6.3	±	0.9	5.8	±	0.5	3.4	±	0.5	2.2	±	0.5	0.0451	*
	32	SC	10.1	±	0.7	9.1	±	0.2	8.5	±	1.1	8.3	±	1.4	3.4	±	0.3	2.7	±	0	0.3224	ns
	34	SC	4.3	±	0.1	5.4	±	0.4	4.5	±	0.4	4.7	±	0.3	3.2	±	0.2	3	±	0.2	0.0852	ns
	36	SC	6.6	±	2.1	4.7	±	0.3	5.2	±	0.1	5.4	±	0.2	2.5	±	0.1	2.2	±	0.3	0.4061	ns
	44	SC	6.6	±	0.6	7.3	±	0.3	5.5	±	0.4	5.3	±	0.1	3.3	±	0.3	2.9	±	0.1	0.0046	**
	statistical effects (age)		0.0059 **			< 0.0001 ****			0.0013 **			0.0049 **			0.0398 *			0.1010 ns
Campesterol to Cholesterol [%]	12	SC	0.15	±	0	0.14	±	0	0.13	±	0.01	0.13	±	0	2.3	±	0.4	2.5	±	0	0.002	**
	20	SC	0.11	±	0	0.14	±	0.01	0.11	±	0.01	0.12	±	0.01	1.9	±	0	2.3	±	0.2	0.0046	**
	32	SC	0.13	±	0.01	0.21	±	0.01	0.14	±	0	0.16	±	0	1.8	±	0.1	2	±	0.1	< 0.0001	****
	34	SC	0.11	±	0.01	0.18	±	0.01	0.12	±	0.01	0.13	±	0.01	2.2	±	0.3	2	±	0.1	0.0002	***
	36	SC	0.12	±	0.01	0.15	±	0.02	0.11	±	0.01	0.16	±	0.01	1.6	±	0.1	2.1	±	0.1	0.0056	**
	44	SC	0.16	±	0.01	0.22	±	0	0.19	±	0	0.21	±	0.01	2.1	±	0.4	2.4	±	0.1	0.0002	***
	statistical effects (age)		0.0002 ***			< 0.0001 ****			< 0.0001 ****			< 0.0001 ****			0.1552 ns			0.0458 *
Sitosterol to Cholesterol [%]	12	SC	0.03	±	0	0.02	±	0	0.02	±	0	0.02	±	0	0.73	±	0.09	0.98	±	0	0.3299	ns
	20	SC	0.01	±	0	0.02	±	0	0.02	±	0	0.02	±	0	0.56	±	0.07	1.08	±	0.15	0.2503	ns
	32	SC	0.01	±	0	0.02	±	0	0.02	±	0	0.02	±	0	0.54	±	0.06	0.74	±	0.03	0.0059	**
	34	SC	0.02	±	0.01	0.03	±	0	0.03	±	0	0.03	±	0	0.68	±	0.06	0.66	±	0.03	0.1095	ns
	36	SC	0.02	±	0	0.03	±	0	0.02	±	0	0.03	±	0	0.67	±	0.02	0.95	±	0.12	0.0023	**
	44	SC	0.02	±	0	0.03	±	0	0.03	±	0	0.04	±	0	0.63	±	0.15	0.84	±	0.06	0.0014	**
	statistical effects (age)		0.0870 ns			< 0.0001 ****			0.0003 ***			< 0.0001 ****			0.2431 ns			0.0147 *
Lanosterol to Cholesterol [%]	12	SC	0.04	±	0	0.02	±	0	0.02	±	0	0.02	±	0	0.11	±	0.01	0.04	±	0	< 0.0001	****
	20	SC	0.03	±	0	0.01	±	0	0.01	±	0	0.01	±	0	0.11	±	0.01	0.05	±	0.01	< 0.0001	****
	32	SC	0.03	±	0	0.01	±	0	0.02	±	0	0.01	±	0	0.1	±	0.03	0.04	±	0	< 0.0001	****
	34	SC	0.02	±	0	0.01	±	0	0.01	±	0	0.01	±	0	0.08	±	0.01	0.04	±	0	0.0077	**
	36	SC	0.03	±	0	0.01	±	0	0.01	±	0	0.01	±	0	0.11	±	0.02	0.05	±	0	0.0003	***
	44	SC	0.03	±	0	0.02	±	0	0.02	±	0	0.01	±	0	0.18	±	0.01	0.06	±	0	< 0.0001	****
	statistical effects (age)		< 0.0001 ****			0.0010 **			< 0.0001 ****			0.0076 **			0.0029 **			0.0005 ***
Desmosterol to Cholesterol [%]	12	SC	0.54	±	0.02	0.33	±	0.01	0.69	±	0.03	0.49	±	0.01	0.11	±	0.02	0.16	±	0	< 0.0001	****
	20	SC	0.53	±	0.02	0.28	±	0.01	0.47	±	0.02	0.44	±	0.03	0.12	±	0.02	0.17	±	0.02	< 0.0001	****
	32	SC	0.58	±	0.03	0.25	±	0.01	0.44	±	0.01	0.42	±	0.01	0.07	±	0.03	0.16	±	0	< 0.0001	****
	34	SC	0.44	±	0.03	0.18	±	0.04	0.32	±	0.01	0.34	±	0.02	0.11	±	0.01	0.11	±	0	< 0.0001	****
	36	SC	0.5	±	0.03	0.26	±	0.01	0.38	±	0	0.45	±	0.01	0.07	±	0.01	0.15	±	0.01	< 0.0001	****
	44	SC	0.33	±	0.01	0.24	±	0.01	0.47	±	0.02	0.43	±	0.01	0.14	±	0.02	0.19	±	0	< 0.0001	****
	statistical effects (age)		< 0.0001 ****			0.0001 ***			< 0.0001 ****			< 0.0001 ****			0.0148 *			0.0005 ***
