# Supplementary material for: Plant Sterol-Poor Diet Is Associated with Pro-Inflammatory Lipid Mediators in the Murine Brain
Source: Int J Mol Sci. 2021 Dec 8;22(24):13207. doi: 10.3390/ijms222413207 (PMC8707069; doi:10.3390/ijms222413207)
Supplement: Supplementary file 1 [file ijms-22-13207-s001.zip › Table S4 correlation PS_sterols.xlsx]

## Sheet: Pearson correlation 
Table S4. Pearson correlation of the plant sterols (PS) campesterol, sitosterol, stigma-sterol and brassicasterol with cholesterol and its precursors desmosterol and lanosterol. Regarded sample matrices were plasma, liver and the brain structures cerebellum (cer), hypothalamus (hyp), hip-pocampus (hippo), cortex (cor). Male C57BL6/J were fed either standard chow or high fat diet for 4 to 24 weeks…
Pearson correlation		Standard chow diet															High fat diet
		Campesterol			Sitosterol			Stigmasterol			Brassciasterol			total PS			Campesterol			Sitosterol			Stigmasterol			Brassciasterol			total PS
plasma	Cholesterol	0.325	ns	(n=6)	-0.295	ns	(n=6)	-0.056	ns	(n=6)	-0.476	ns	(n=6)	0.123	ns	(n=6)	-0.002	ns	(n=4)	0.193	ns	(n=4)	0.035	ns	(n=4)		-			-
	Desmosterol	0.321	ns	(n=6)	-0.794	ns	(n=6)	-0.544	ns	(n=6)	-0.381	ns	(n=6)	-0.273	ns	(n=6)	-0.741	ns	(n=4)	-0.588	ns	(n=4)	-0.662	ns	(n=4)		-			-
	Lanosterol	-0.56	ns	(n=6)	-0.243	ns	(n=6)	-0.079	ns	(n=6)	0.587	ns	(n=6)	0.78	ns	(n=6)	-0.242	ns	(n=4)	-0.043	ns	(n=4)	-0.182	ns	(n=4)		-			-
liver	Cholesterol	0.602	ns	(n=9)	0.627	ns	(n=9)		-			-			-		0.685	*	(n=9)	0.092	ns	(n=7)		-			-			-
	Desmosterol	0.082	ns	(n=9)	-0.115	ns	(n=9)		-			-			-		-0.199	ns	(n=9)	0.075	ns	(n=7)		-			-			-
	Lanosterol	0.085	ns	(n=9)	0.041	ns	(n=9)		-			-			-		0.698	*	(n=9)	-0.526	ns	(n=7)		-			-			-
brain	Cholesterol	0.658	***	(n=36)	0.636	***	(n=36)	-0.505	**	(n=36)	0.172	ns	(n=36)	0.56	***	(n=36)	0.264	ns	(n=36)	0.078	ns	(n=36)	-0.478	**	(n=36)	0.235	ns	(n=36)	-0.223	ns	(n=36)
	Desmosterol	-0.108	ns	(n=36)	0.251	ns	(n=36)	0.151	ns	(n=36)	0.26	ns	(n=36)	0.077	ns	(n=36)	0.093	ns	(n=36)	0.169	ns	(n=36)	0.156	ns	(n=36)	0.474	**	(n=36)	0.243	ns	(n=36)
	Lanosterol	-0.525	***	(n=36)	-0.241	ns	(n=36)	0.842	***	(n=36)	0.46	**	(n=36)	-0.11	ns	(n=36)	-0.131	ns	(n=36)	0.068	ns	(n=36)	0.855	***	(n=36)	0.559	***	(n=36)	0.622	***	(n=36)
Cer	Cholesterol	0.29	ns	(n=9)	0.21	ns	(n=9)	-0.451	ns	(n=9)	0.723	*	(n=9)	0.307	ns	(n=9)	-0.806	**	(n=9)	-0.303	ns	(n=9)	-0.805	**	(n=9)	0.852	**	(n=9)	-0.782	*	(n=9)
	Desmosterol	-0.202	ns	(n=9)	0.556	ns	(n=9)	-0.056	ns	(n=9)	0.404	ns	(n=9)	-0.096	ns	(n=9)	0.452	ns	(n=9)	0.751	*	(n=9)	0.119	ns	(n=9)	0.046	ns	(n=9)	0.519	ns	(n=9)
	Lanosterol	-0.585	ns	(n=9)	0.727	*	(n=9)	0.492	ns	(n=9)	-0.123	ns	(n=9)	-0.36	ns	(n=9)	0.878	**	(n=9)	0.528	ns	(n=9)	0.812	**	(n=9)	-0.9	***	(n=9)	0.868	**	(n=9)
Hyp	Cholesterol	0.196	ns	(n=9)	0.382	ns	(n=9)	-0.587	ns	(n=9)	0.889	***	(n=9)	0.14	ns	(n=9)	-0.07	ns	(n=9)	0.076	ns	(n=9)	-0.467	ns	(n=9)	0.741	*	(n=9)	-0.11	ns	(n=9)
	Desmosterol	-0.217	ns	(n=9)	0.342	ns	(n=9)	-0.161	ns	(n=9)	0.551	ns	(n=9)	-0.149	ns	(n=9)	0.625	ns	(n=9)	0.686	*	(n=9)	0.225	ns	(n=9)	0.102	ns	(n=9)	0.614	ns	(n=9)
	Lanosterol	-0.806	**	(n=9)	-0.042	ns	(n=9)	0.798	**	(n=9)	-0.561	ns	(n=9)	-0.555	ns	(n=9)	0.95	***	(n=9)	0.928	***	(n=9)	0.726	*	(n=9)	-0.526	ns	(n=9)	0.971	***	(n=9)
Hippo	Cholesterol	0.825	**	(n=9)	0.659	ns	(n=9)	-0.813	**	(n=9)	0.875	**	(n=9)	0.705	*	(n=9)	0.419	ns	(n=9)	-0.027	ns	(n=6)	-0.132	ns	(n=9)	0.904	***	(n=9)	-0.432	ns	(n=6)
	Desmosterol	0.241	ns	(n=9)	0.696	*	(n=9)	-0.216	ns	(n=9)	0.238	ns	(n=9)	0.298	ns	(n=9)	0.766	*	(n=9)	-0.01	ns	(n=6)	0.252	ns	(n=9)	0.762	*	(n=9)	-0.445	ns	(n=6)
	Lanosterol	-0.04	ns	(n=9)	0.371	ns	(n=9)	0.417	ns	(n=9)	-0.36	ns	(n=9)	0.136	ns	(n=9)	0.799	**	(n=9)	0.005	ns	(n=6)	0.55	ns	(n=9)	0.476	ns	(n=9)	0.053	ns	(n=6)
Cor	Cholesterol	-0.103	ns	(n=9)	-0.126	ns	(n=9)	-0.578	ns	(n=9)	0.882	**	(n=9)	-0.096	ns	(n=9)	-0.21	ns	(n=9)	-0.653	ns	(n=6)	0.007	ns	(n=9)	0.876	**	(n=9)	-0.437	ns	(n=6)
	Desmosterol	-0.26	ns	(n=9)	-0.387	ns	(n=9)	-0.732	*	(n=9)	0.98	***	(n=9)	-0.312	ns	(n=9)	-0.238	ns	(n=9)	-0.753	ns	(n=6)	-0.12	ns	(n=9)	0.91	***	(n=9)	0.584	ns	(n=6)
	Lanosterol	0.578	ns	(n=9)	0.475	ns	(n=9)	-0.251	ns	(n=9)	0.272	ns	(n=9)	0.435	ns	(n=9)	0.329	ns	(n=9)	0.188	ns	(n=6)	0.681	*	(n=9)	0.339	ns	(n=9)	0.496	ns	(n=6)
