# Supplementary material for: Plant Sterol-Poor Diet Is Associated with Pro-Inflammatory Lipid Mediators in the Murine Brain
Source: Int J Mol Sci. 2021 Dec 8;22(24):13207. doi: 10.3390/ijms222413207 (PMC8707069; doi:10.3390/ijms222413207)
Supplement: Supplementary file 1 [file ijms-22-13207-s001.zip › Table S5 sterols HF+SC.xlsx]

## Sheet: Sterols intervention
Table S5. Sterol composition of brain structures (cortex, cerebellum, hippocampus, hypothalamus), liver and plasma from male C57BL/6J mice fed a coconut oil-based high-fat (HF) diet from age 8 to 32 weeks followed by a standard chow diet (SC) from age 32 to 44 weeks. Data are expressed as mean±SD. Statistics: one-way ANOVA with p<0.05*, p<0.01**, p<0.001***, p<0.0001****; not significant (ns); pl…
Analyte	age	diet	Cortex			Cerebellum			Hippocampus			Hypothalamus			Liver			Plasma			statistical effects (brain)
Campesterol§	12	HF	9.2	±	0.2	10.2	±	0.2	8.9	±	0.4	12	±	0.7	1.6	±	0.3	0.3	±	0	0.0004	***
	20	HF	4.8	±	0.3	8.8	±	0.1	8.4	±	0.2	8.3	±	0.6	1.9	±	0.1	0.2	±	0	< 0.0001	****
	32	HF	3.9	±	0.2	8.6	±	0.1	4	±	0.5	7.1	±	0.4	3.1	±	0.3	0.7	±	0	< 0.0001	****
	34	SC	4.7	±	0.4	9.3	±	0.7	4.7	±	0.3	7.8	±	0.4	22.2	±	4.3	3.1	±	0.2	< 0.0001	****
	36	SC	7.1	±	0.6	11.3	±	0.4	6.4	±	0.4	9.3	±	0.6	24.6	±	3.4	4.3	±	0.1	< 0.0001	****
	44	SC	11.1	±	0.6	14.4	±	0.4	11	±	0.7	15.3	±	0.9	22.9	±	5.1	4.6	±	0.1	0.0004	***
	statistical effects (age)		< 0.0001 ****			< 0.0001 ****			< 0.0001 ****			< 0.0001 ****			< 0.0001 ****			-
Stigmasterol§	12	HF	4.3	±	0.3	10.2	±	0.2	6.4	±	0.4	4.9	±	0.7	<LOD			0.06	±	0.01	< 0.0001	****
	20	HF	2.4	±	0.6	8.8	±	0.1	4.3	±	0.5	1.6	±	0.2	<LOD			0.06	±	0	< 0.0001	****
	32	HF	3.3	±	0.5	8.6	±	0.1	3.3	±	0.7	3.1	±	0.2	<LOD			0.1	±	0	< 0.0001	****
	34	SC	4.9	±	0	9.3	±	0.7	4.1	±	0.5	4.6	±	0.4	<LOD			0.11	±	0	< 0.0001	****
	36	SC	4.4	±	0.5	11.3	±	0.4	3.4	±	0.3	3.6	±	0.4	<LOD			0.12	±	0.02	< 0.0001	****
	44	SC	3.5	±	0.2	14.4	±	0.4	5.6	±	0.2	3.3	±	0.4	<LOD			0.12	±	0.01	< 0.0001	****
	statistical effects (age)		0.0005 ***			< 0.0001 ****			0.0001 ***			< 0.0001 ****			-			-
Sitosterol§	12	HF	1.6	±	0.5	1.4	±	0.3	1.5	±	0.4	2.4	±	0.4	1.3	±	0	0.3	±	0	0.1213	ns
	20	HF	0.3	±	0.1	1.2	±	0.1	1.3	±	0.5	1.2	±	0.3	0.7	±	0.2	0.3	±	0	0.0336	*
	32	HF	<LOD			0.7	±	0.1	<LOD			0.6	±	0.5	0.4	±	0.1	0.6	±	0	-
	34	SC	<LOD			2.8	±	0	<LOD			<LOD			8.6	±	1.4	1.6	±	0.2	-
	36	SC	2.7	±	0.7	5.4	±	0.1	2.4	±	0.1	4	±	0.4	7.4	±	0.5	1.6	±	0.3	0.0004	***
	44	SC	2.6	±	0.2	2.6	±	0.2	2.5	±	0.2	3.1	±	0.3	7.4	±	1.1	1.6	±	0.1	0.0748	ns
	statistical effects (age)		0.0023 **			-			0.0192 *			< 0.0001 ****			< 0.0001 ****			-
Brassicasterol§	12	HF	2.51	±	0.25807	1.35667	±	0.0654896	1.67	±	0.275802	1.3	±	0.121929	< LOD			< LOD			0.0011	**
	20	HF	4.06	±	0.381925	2.24667	±	0.170163	3.61333	±	0.054365	2.32	±	0.160831	< LOD			< LOD			< 0.0001	****
	32	HF	3.02333	±	0.0579272	1.81333	±	0.0339935	2.02	±	0.182392	1.84667	±	0.140554	< LOD			< LOD			< 0.0001	****
	34	SC	2.56667	±	0.132246	0.53	±	0.0860233	1.05	±	0.175689	0.513333	±	0.450654	< LOD			0.02	±	0	0.0001	***
	36	SC	2.71667	±	0.266375	2.10333	±	0.12037	1.65	±	0.0725718	1.45	±	0.0860233	< LOD			0.0533333	±	0.0124722	0.0002	***
	44	SC	2.55333	±	0.189268	0.946667	±	0.171529	1.4	±	0.0374166	1.13667	±	0.150849	< LOD			0.07	±	0	< 0.0001	****
	statistical effects (age)		0.0002 ***			< 0.0001 ****			< 0.0001 ****			< 0.0001 ****			-			0.0229 *
total PS§	12	HF	17.58	±	1.03	23.1	±	0.42	18.46	±	0.57	20.6	±	1.74	2.01	±	0.56	0.61	±	0.03	0,0037	**
	20	HF	11.56	±	0.15	20.99	±	0.45	17.51	±	0.53	13.45	±	0.59	2.6	±	0.27	0.52	±	0	< 0.0001	****
	32	HF	10.27	±	0.26	19.7	±	0.1	9.31	±	0.83	12.59	±	0.66	3.45	±	0.3	1.43	±	0	< 0.0001	****
	34	SC	12.11	±	0.3	20.03	±	2.7	9.81	±	0.93	12.95	±	1.19	30.82	±	5.72	4.69	±	0.08	0,0009	***
	36	SC	16.91	±	1.43	30	±	0.94	13.83	±	0.56	18.36	±	1.22	31.97	±	3.9	6.02	±	0.21	< 0.0001	****
	44	SC	19.72	±	1.19	32.24	±	0.85	20.43	±	0.83	22.86	±	1.64	30.31	±	6.17	6.37	±	0.17	< 0.0001	****
	statistical effects (age)		< 0.0001 ****			< 0.0001 ****			< 0.0001 ****			< 0.0001 ****			0.1965 ns			-
Lanosterol§	12	HF	3.5	±	0.2	2.6	±	0.1	2.4	±	0	2.2	±	0.2	1.7	±	0.1	0.08	±	0.01	0.0002	***
	20	HF	3.4	±	0.5	1.8	±	0.1	2.6	±	0.3	1.7	±	0.1	2.8	±	0.9	0.15	±	0	0.0021	**
	32	HF	3.1	±	0.1	2	±	0.1	1.8	±	0.1	1.5	±	0.1	4.2	±	1.8	0.1	±	0	< 0.0001	****
	34	SC	2.6	±	0.1	1.2	±	0.1	1.4	±	0	1.5	±	0.2	1.8	±	0.2	0.06	±	0	< 0.0001	****
	36	SC	2.5	±	0.4	1.7	±	0.4	0.8	±	0	1.3	±	0	2	±	0.4	0.05	±	0	0.0027	**
	44	SC	3.2	±	0.4	1.6	±	0.1	1.9	±	0.1	1.4	±	0.1	2.1	±	0.5	0.08	±	0.01	0.0001	***
	statistical effects (age)		0.0597 ns			< 0.0001 ****			< 0.0001 ****			0.0002 ***			0.1257 ns			-
Desmosterol§	12	HF	46.2	±	0.8	36.2	±	2.1	62.9	±	2.1	65.6	±	8.1	1.8	±	0	1.1	±	0	0.0004	***
	20	HF	68.1	±	7.2	36.7	±	1.9	85.8	±	5.4	64.3	±	6.3	1.5	±	0.4	1.5	±	0	0.0002	***
	32	HF	44.1	±	1.8	31.8	±	0.8	43	±	2.3	53.4	±	2.4	1.5	±	0.7	0.9	±	0	< 0.0001	****
	34	SC	41.9	±	0.8	21.9	±	7.7	37.4	±	0.9	53.9	±	5.4	1.4	±	0.2	0.2	±	0	0.001	**
	36	SC	56.3	±	4	50.1	±	4.6	44.9	±	3.5	72	±	2.9	0.6	±	0	0.3	±	0	0.0005	***
	44	SC	30.2	±	3.1	28.9	±	2.6	50	±	1.8	56	±	2.3	2	±	0.5	0.4	±	0	< 0.0001	****
	statistical effects (age)		< 0.0001 ****			0.0003 ***			< 0.0001 ****			0.0163 *			0.0716 ns			-
Cholesterol§	12	HF	9297	±	119	9787	±	590	10317	±	272	12733	±	1678	1170	±	212	360	±	5	0.0217	*
	20	HF	11263	±	979	12667	±	660	16667	±	1763	15667	±	1427	1145	±	150	490	±	0	0.0092	**
	32	HF	9163	±	617	11600	±	294	10050	±	389	12700	±	698	1397	±	71	427	±	0	0.0006	***
	34	SC	10633	±	403	12600	±	779	10833	±	464	15800	±	1374	1547	±	322	228	±	3	0.001	***
	36	SC	12450	±	374	15750	±	1738	10250	±	1202	16583	±	715	1303	±	39	233	±	29	0.0017	**
	44	SC	9720	±	1473	11500	±	1020	9827	±	217	11667	±	330	1450	±	300	230	±	15	0.1235	ns
	statistical effects (age)		0.0094 **			0.0012 **			< 0.0001 ****			0.0038 **			0.403 ns			-
§	[ng/mg Tissue / µg/mL Plasma]

## Sheet: additional statistics
Bonferroni's multiple comparisons test (p-values)
campesterol	cortex	cerebellum	hippocampus	hypothalamus	brain	liver	plasma	circulation
12 vs. 20	<0.0001	0.0474	>0.9999	0.0012	<0.0001	>0.9999	>0.9999	>0.9999
12 vs. 32	<0.0001	0.0205	<0.0001	<0.0001	<0.0001	>0.9999	>0.9999	>0.9999
12 vs. 34	<0.0001	0.5716	<0.0001	0.0004	<0.0001	0.0004	0.0002	0.0005
12 vs. 36	0.0048	0.2209	0.0026	0.0168	0.001	0.0001	<0.0001	<0.0001
12 vs. 44	0.0112	<0.0001	0.0084	0.0033	<0.0001	0.0007	<0.0001	0.0004
20 vs. 32	0.8918	>0.9999	<0.0001	>0.9999	0.0005	>0.9999	>0.9999	>0.9999
20 vs. 34	>0.9999	>0.9999	<0.0001	>0.9999	0.0551	0.0004	0.0005	0.0005
20 vs. 36	0.0022	0.0004	0.0147	>0.9999	0.0517	0.0001	<0.0001	<0.0001
20 vs. 44	<0.0001	<0.0001	0.0016	<0.0001	<0.0001	0.0008	<0.0001	0.0004
32 vs. 34	>0.9999	>0.9999	>0.9999	>0.9999	0.2342	0.0007	0.0013	0.0009
32 vs. 36	0.0001	0.0002	0.0031	0.0673	<0.0001	0.0002	0.0001	0.0002
32 vs. 44	<0.0001	<0.0001	<0.0001	<0.0001	<0.0001	0.0014	0.0001	0.0007
34 vs. 36	0.0014	0.0035	0.0484	0.6086	0.0002	>0.9999	0.0069	>0.9999
34 vs. 44	<0.0001	<0.0001	<0.0001	<0.0001	<0.0001	>0.9999	0.0034	>0.9999
36 vs. 44	<0.0001	<0.0001	<0.0001	<0.0001	<0.0001	>0.9999	>0.9999	>0.9999
stigmasterol	cortex	cerebellum	hippocampus	hypothalamus	brain	liver	plasma	circulation
12 vs. 20	0.0069	0.0474	0.0081	<0.0001	<0.0001	-	>0.9999	>0.9999
12 vs. 32	0.5517	0.0205	0.0003	0.0156	<0.0001	-	>0.9999	>0.9999
12 vs. 34	>0.9999	0.5716	0.0042	>0.9999	0.0324	-	>0.9999	>0.9999
12 vs. 36	>0.9999	0.2209	0.0004	0.1433	0.0211	-	0.3774	0.3774
12 vs. 44	>0.9999	<0.0001	>0.9999	0.035	>0.9999	-	0.42	0.42
20 vs. 32	0.4867	>0.9999	>0.9999	0.0528	>0.9999	-	>0.9999	>0.9999
20 vs. 34	0.0005	>0.9999	>0.9999	0.0002	<0.0001	-	>0.9999	>0.9999
20 vs. 36	0.0042	0.0004	>0.9999	0.0061	0.0001	-	0.7645	0.7645
20 vs. 44	0.2541	<0.0001	0.221	0.0233	<0.0001	-	0.7683	0.7683
32 vs. 34	0.0299	>0.9999	>0.9999	0.0552	0.001	-	>0.9999	>0.9999
32 vs. 36	0.3227	0.0002	>0.9999	>0.9999	0.0014	-	>0.9999	>0.9999
32 vs. 44	>0.9999	<0.0001	0.006	>0.9999	<0.0001	-	>0.9999	>0.9999
34 vs. 36	>0.9999	0.0035	>0.9999	0.5236	>0.9999	-	>0.9999	>0.9999
34 vs. 44	0.0568	<0.0001	0.1065	0.1272	0.0031	-	>0.9999	>0.9999
36 vs. 44	0.6153	<0.0001	0.0079	>0.9999	0.0021	-	>0.9999	>0.9999
sitosterol	cortex	cerebellum	hippocampus	hypothalamus	brain	liver	plasma	circulation
12 vs. 20	0.1219	>0.9999	>0.9999	0.0889	0.0186	>0.9999	>0.9999	>0.9999
12 vs. 32	-	0.0712	-	0.0051	<0.0001	>0.9999	>0.9999	>0.9999
12 vs. 34	-	0.0064	-	-	0.0208	0.0018	0.0534	0.0005
12 vs. 36	0.2218	<0.0001	0.2484	0.0164	<0.0001	0.0065	0.0342	0.0009
12 vs. 44	0.3872	0.0023	0.1715	0.8508	0.0034	0.0098	0.0516	0.0019
20 vs. 32	-	0.4196	-	>0.9999	0.0327	>0.9999	>0.9999	>0.9999
20 vs. 34	-	0.0023	-	-	>0.9999	<0.0001	0.1288	0.0002
20 vs. 36	0.0039	<0.0001	0.0738	0.0002	<0.0001	0.0003	0.0971	0.0003
20 vs. 44	0.0061	0.0006	0.0518	0.0043	<0.0001	0.0006	0.1249	0.0008
32 vs. 34	-	0.0002	-	-	>0.9999	<0.0001	0.3953	0.0001
32 vs. 36	-	<0.0001	-	<0.0001	<0.0001	0.0002	0.3044	0.0003
32 vs. 44	-	<0.0001	-	0.0004	<0.0001	0.0004	0.3811	0.0007
34 vs. 36	-	<0.0001	-	-	<0.0001	>0.9999	>0.9999	>0.9999
34 vs. 44	-	>0.9999	-	-	0.0001	>0.9999	>0.9999	>0.9999
36 vs. 44	>0.9999	<0.0001	>0.9999	0.3999	0.0031	>0.9999	>0.9999	>0.9999
brassicasterol	cortex	cerebellum	hippocampus	hypothalamus	brain	liver	plasma	circulation
12 vs. 20	0.0004	0.0001	<0.0001	0.009	<0.0001	-	-	-
12 vs. 32	0.781	0.0365	0.703	0.4418	0.0025	-	-	-
12 vs. 34	>0.9999	0.0002	0.0303	0.0594	0.0006	-	-	-
12 vs. 36	>0.9999	0.0006	>0.9999	>0.9999	0.1341	-	-	-
12 vs. 44	>0.9999	0.0747	>0.9999	>0.9999	0.6027	-	-	-
20 vs. 32	0.0141	0.0522	<0.0001	0.8049	<0.0001	-	-	-
20 vs. 34	0.0006	<0.0001	<0.0001	<0.0001	<0.0001	-	-	-
20 vs. 36	0.0016	>0.9999	<0.0001	0.0299	<0.0001	-	-	-
20 vs. 44	0.0006	<0.0001	<0.0001	0.0026	<0.0001	-	-	-
32 vs. 34	>0.9999	<0.0001	0.0008	0.0009	<0.0001	-	-	-
32 vs. 36	>0.9999	0.4792	0.5593	>0.9999	0.6572	-	-	-
32 vs. 44	>0.9999	0.0002	0.0303	0.1126	<0.0001	-	-	-
34 vs. 36	>0.9999	<0.0001	0.0382	0.0174	<0.0001	-	0.0833	0.0833
34 vs. 44	>0.9999	0.0674	0.703	0.2331	0.0285	-	0.0294	0.0294
36 vs. 44	>0.9999	<0.0001	>0.9999	>0.9999	0.0023	-	0.4987	0.4987
total PS	cortex	cerebellum	hippocampus	hypothalamus	brain	liver	plasma	circulation
12 vs. 20	0.0003	>0.9999	>0.9999	0.0015	>0.9999	>0.9999	>0.9999	>0.9999
12 vs. 32	<0.0001	0.2722	<0.0001	0.0005	0.2412	>0.9999	0.3081	>0.9999
12 vs. 34	0.0007	0.4459	<0.0001	0.0008	>0.9999	0.0001	<0.0001	0.0002
12 vs. 36	>0.9999	0.0019	0.0005	>0.9999	0.0065	<0.0001	<0.0001	<0.0001
12 vs. 44	0.4914	0.0001	0.2804	>0.9999	0.0067	0.0004	<0.0001	0.0003
20 vs. 32	>0.9999	>0.9999	<0.0001	>0.9999	>0.9999	>0.9999	0.3557	>0.9999
20 vs. 34	>0.9999	>0.9999	<0.0001	>0.9999	0.1491	0.0001	0.0002	0.0003
20 vs. 36	0.0009	0.0002	0.0041	0.0301	0.0008	<0.0001	<0.0001	<0.0001
20 vs. 44	<0.0001	<0.0001	0.0256	0.0001	0.0008	0.0005	<0.0001	0.0004
32 vs. 34	0.905	>0.9999	>0.9999	>0.9999	0.0097	0.0002	0.0007	0.0004
32 vs. 36	0.0001	<0.0001	0.0007	0.0089	<0.0001	0.0001	<0.0001	0.0001
32 vs. 44	<0.0001	<0.0001	<0.0001	<0.0001	<0.0001	0.0006	<0.0001	0.0005
34 vs. 36	0.0023	<0.0001	0.0019	0.0147	0.1565	>0.9999	0.0116	>0.9999
34 vs. 44	<0.0001	<0.0001	<0.0001	<0.0001	0.1622	>0.9999	0.006	>0.9999
36 vs. 44	0.1201	>0.9999	<0.0001	0.0555	>0.9999	>0.9999	>0.9999	>0.9999
lanosterol	cortex	cerebellum	hippocampus	hypothalamus	brain	liver	plasma	circulation
12 vs. 20	>0.9999	0.006	>0.9999	0.0253	>0.9999	>0.9999	0.0019	>0.9999
12 vs. 32	>0.9999	0.0425	0.0147	0.003	>0.9999	0.2646	0.2496	0.2663
12 vs. 34	0.437	<0.0001	0.0002	0.003	0.1263	>0.9999	0.7254	>0.9999
12 vs. 36	0.2237	0.0014	<0.0001	0.0003	0.131	>0.9999	0.045	>0.9999
12 vs. 44	>0.9999	0.0005	0.1213	0.0005	0.9159	>0.9999	>0.9999	>0.9999
20 vs. 32	>0.9999	>0.9999	0.0012	>0.9999	>0.9999	>0.9999	0.0253	>0.9999
20 vs. 34	0.5402	0.0264	<0.0001	>0.9999	0.0625	>0.9999	0.0008	>0.9999
20 vs. 36	0.2774	>0.9999	<0.0001	0.2441	0.0648	>0.9999	0.0003	>0.9999
20 vs. 44	>0.9999	>0.9999	0.0079	0.545	0.4619	>0.9999	0.0019	>0.9999
32 vs. 34	>0.9999	0.0039	0.3048	>0.9999	0.0242	0.3221	0.036	0.318
32 vs. 36	>0.9999	>0.9999	0.0004	>0.9999	0.0251	0.4577	0.0074	0.459
32 vs. 44	>0.9999	0.2652	>0.9999	>0.9999	0.1764	0.8276	0.2496	0.8731
34 vs. 36	>0.9999	0.135	0.0351	>0.9999	>0.9999	>0.9999	0.7881	>0.9999
34 vs. 44	>0.9999	0.5371	0.0359	>0.9999	>0.9999	>0.9999	0.7254	>0.9999
36 vs. 44	0.7725	>0.9999	<0.0001	>0.9999	>0.9999	>0.9999	0.045	>0.9999
desmosterol	cortex	cerebellum	hippocampus	hypothalamus	brain	liver	plasma	circulation
12 vs. 20	0.0011	>0.9999	0.0001	>0.9999	<0.0001	>0.9999	0.0004	>0.9999
12 vs. 32	>0.9999	>0.9999	0.0004	0.5089	0.0012	>0.9999	0.0346	>0.9999
12 vs. 34	>0.9999	0.0553	<0.0001	0.6013	<0.0001	>0.9999	<0.0001	>0.9999
12 vs. 36	0.2698	0.0702	0.001	>0.9999	>0.9999	0.1698	<0.0001	0.3821
12 vs. 44	0.0148	>0.9999	0.0167	>0.9999	<0.0001	>0.9999	<0.0001	>0.9999
20 vs. 32	0.0005	>0.9999	<0.0001	0.8073	<0.0001	>0.9999	0.0001	>0.9999
20 vs. 34	0.0002	0.044	<0.0001	0.95	<0.0001	>0.9999	<0.0001	>0.9999
20 vs. 36	0.1209	0.0885	<0.0001	>0.9999	<0.0001	0.5514	<0.0001	>0.9999
20 vs. 44	<0.0001	>0.9999	<0.0001	>0.9999	<0.0001	>0.9999	<0.0001	>0.9999
32 vs. 34	>0.9999	0.4326	>0.9999	>0.9999	0.032	>0.9999	<0.0001	>0.9999
32 vs. 36	0.0941	0.0096	>0.9999	0.0497	0.0003	0.5349	<0.0001	>0.9999
32 vs. 44	0.0411	>0.9999	0.6034	>0.9999	0.7503	>0.9999	0.0001	>0.9999
34 vs. 36	0.0321	0.0002	0.4378	0.0588	<0.0001	0.8401	>0.9999	>0.9999
34 vs. 44	0.1209	>0.9999	0.0195	>0.9999	>0.9999	>0.9999	0.0217	>0.9999
36 vs. 44	0.0002	0.0029	>0.9999	0.1278	<0.0001	0.1131	0.0528	0.8189
cholesterol	cortex	cerebellum	hippocampus	hypothalamus	brain	liver	plasma	circulation
12 vs. 20	0.448	0.1668	0.0002	0.3712	<0.0001	>0.9999	0.1151	>0.9999
12 vs. 32	>0.9999	>0.9999	>0.9999	>0.9999	>0.9999	>0.9999	>0.9999	>0.9999
12 vs. 34	>0.9999	0.1897	>0.9999	0.2994	0.003	>0.9999	0.0458	>0.9999
12 vs. 36	0.029	0.0007	>0.9999	0.084	<0.0001	>0.9999	0.0368	>0.9999
12 vs. 44	>0.9999	>0.9999	>0.9999	>0.9999	>0.9999	>0.9999	0.0489	>0.9999
20 vs. 32	0.3296	>0.9999	0.0002	0.3518	<0.0001	>0.9999	>0.9999	>0.9999
20 vs. 34	>0.9999	>0.9999	0.0005	>0.9999	0.0005	>0.9999	0.005	>0.9999
20 vs. 36	>0.9999	0.1126	0.0002	>0.9999	0.9003	>0.9999	0.0042	>0.9999
20 vs. 44	>0.9999	>0.9999	0.0001	0.0659	<0.0001	>0.9999	0.0052	>0.9999
32 vs. 34	>0.9999	>0.9999	>0.9999	0.2837	0.0596	>0.9999	0.0181	>0.9999
32 vs. 36	0.0214	0.015	>0.9999	0.0796	<0.0001	>0.9999	0.0157	>0.9999
32 vs. 44	>0.9999	>0.9999	>0.9999	>0.9999	>0.9999	>0.9999	0.019	>0.9999
34 vs. 36	0.6306	0.099	>0.9999	>0.9999	0.0149	>0.9999	>0.9999	>0.9999
34 vs. 44	>0.9999	>0.9999	>0.9999	0.0532	0.0409	>0.9999	>0.9999	>0.9999
36 vs. 44	0.0763	0.0125	>0.9999	0.0155	<0.0001	>0.9999	>0.9999	>0.9999
