# Supplementary material for: Plant Sterol-Poor Diet Is Associated with Pro-Inflammatory Lipid Mediators in the Murine Brain
Source: Int J Mol Sci. 2021 Dec 8;22(24):13207. doi: 10.3390/ijms222413207 (PMC8707069; doi:10.3390/ijms222413207)
Supplement: Supplementary file 1 [file ijms-22-13207-s001.zip › Table S6 sterol ratios HF+SC.xlsx]

## Sheet: Sterol ratios intervention
Table S6. Sterol ratios of brain structures (cortex, cerebellum, hippocampus, hypothalamus), liver and plasma from male C57BL/6J mice fed a coconut oil-based high-fat (HF) diet from age 8 to 32 weeks followed by a standard chow diet (SC) from age 32 to 44 weeks. Data are expressed as mean±SD. Statistics: one-way ANOVA with p<0.05*, p<0.01**, p<0.001***, p<0.0001****; not significant (ns); limit o…
Analyte	age	diet	Cortex			Cerebellum			Hippocampus			Hypothalamus			Liver			Plasma			statistical effects (brain)
Campesterol to Sitosterol	12	HF	6.3	±	1.9	7.5	±	1.5	6.3	±	1.8	5	±	0.6	1.6	±	0	1.1	±	0.1	0.5007	ns
	20	HF	17.3	±	4	7.3	±	0.3	7.7	±	2.8	7.4	±	2.3	2.7	±	0.4	0.7	±	0	0.0144	ns
	32	HF	<LOD			12.6	±	2.4	<LOD			30.8	±	23.8	9.7	±	3.1	1.2	±	0	-
	34	SC	<LOD			3.6	±	0	<LOD			<LOD			2.6	±	0.1	2	±	0.4	-
	36	SC	4.2	±	1.1	4.3	±	0.6	4.2	±	1	3.6	±	0.3	2.8	±	0.2	2.2	±	0.3	0.8587	ns
	44	SC	5.9	±	0.5	5.7	±	0.6	4.5	±	0.3	4.9	±	0.4	3.1	±	0.2	2.9	±	0.1	0.0546	ns
	statistical effects (age)		0.0017 **			0.0010 ***			0.2227 ns			0.1286 ns			0.0039 **			-
Campesterol to Cholesterol [%]	12	HF	0.01	±	0	0.1	±	0	0.09	±	0.01	0.1	±	0.01	0.14	±	0	0.08	±	0	0.0852	ns
	20	HF	0.04	±	0	0.07	±	0	0.05	±	0.01	0.05	±	0.01	0.17	±	0.01	0.04	±	0	0.0046	**
	32	HF	0.04	±	0	0.07	±	0	0.04	±	0	0.06	±	0	0.22	±	0.03	0.17	±	0	< 0.0001	****
	34	SC	0.04	±	0.01	0.07	±	0.01	0.04	±	0	0.05	±	0	1.46	±	0.29	1.34	±	0.07	0.0015	**
	36	SC	0.06	±	0.01	0.07	±	0.01	0.06	±	0.01	0.06	±	0	1.88	±	0.21	1.86	±	0.2	0.2092	ns
	44	SC	0.12	±	0.02	0.13	±	0.01	0.11	±	0	0.13	±	0	1.57	±	0.03	2.01	±	0.09	0.2491	ns
	statistical effects (age)		< 0.0001 ****			< 0.0001 ****			< 0.0001 ****			< 0.0001 ****			< 0.0001 ****			-
Sitosterol to Cholesterol [%]	12	HF	0.02	±	0	0.01	±	0	0.02	±	0	0.02	±	0	0.08	±	0	0.07	±	0.01	0.583	ns
	20	HF	0	±	0	0.01	±	0	0.01	±	0	0.01	±	0	0.06	±	0.01	0.06	±	0	0.0116	*
	32	HF	<LOD			0.01	±	0	<LOD			0	±	0	0.03	±	0.01	0.14	±	0	-
	34	SC	<LOD			0.02	±	0	<LOD			<LOD			0.57	±	0.11	0.69	±	0.11	-
	36	SC	0.02	±	0.01	0.03	±	0	0.02	±	0	0.02	±	0	0.57	±	0.02	0.69	±	0.14	0.0558	ns
	44	SC	0.03	±	0	0.02	±	0	0.03	±	0	0.03	±	0	0.52	±	0.03	0.68	±	0.01	0.3403	ns
	statistical effects (age)		0.0031 **			< 0.0001 ****			0.0015 **			< 0.0001 ****			< 0.0001 ****			-
Lanosterol to Cholesterol [%]	12	HF	0.04	±	0	0.03	±	0	0.02	±	0	0.02	±	0	0.15	±	0.02	0.02	±	0	< 0.0001	****
	20	HF	0.03	±	0	0.01	±	0	0.02	±	0	0.01	±	0	0.24	±	0.05	0.03	±	0	< 0.0001	****
	32	HF	0.03	±	0	0.02	±	0	0.02	±	0	0.01	±	0	0.3	±	0.13	0.02	±	0	< 0.0001	****
	34	SC	0.02	±	0	0.01	±	0	0.01	±	0	0.01	±	0	0.12	±	0.02	0.03	±	0	< 0.0001	****
	36	SC	0.02	±	0	0.01	±	0	0.01	±	0	0.01	±	0	0.15	±	0.03	0.02	±	0	0.0004	***
	44	SC	0.03	±	0	0.01	±	0	0.02	±	0	0.01	±	0	0.14	±	0.01	0.03	±	0	< 0.0001	****
	statistical effects (age)		< 0.0001 ****			< 0.0001 ****			< 0.0001 ****			< 0.0001 ****			0.0935 ns			-
Desmosterol to Cholesterol [%]	12	HF	0.5	±	0	0.37	±	0	0.61	±	0.01	0.52	±	0.01	0.15	±	0.02	0.3	±	0	< 0.0001	****
	20	HF	0.6	±	0.01	0.29	±	0.03	0.52	±	0.03	0.41	±	0	0.13	±	0.03	0.31	±	0	< 0.0001	****
	32	HF	0.48	±	0.01	0.27	±	0	0.43	±	0.01	0.42	±	0.01	0.11	±	0.05	0.21	±	0	< 0.0001	****
	34	SC	0.4	±	0.02	0.17	±	0.05	0.35	±	0.01	0.34	±	0.01	0.09	±	0.01	0.09	±	0	0.0004	***
	36	SC	0.45	±	0.02	0.32	±	0.02	0.44	±	0.02	0.43	±	0.01	0.04	±	0	0.11	±	0	0.0002	***
	44	SC	0.31	±	0.02	0.25	±	0.01	0.51	±	0.01	0.48	±	0.01	0.14	±	0	0.16	±	0	< 0.0001	****
	statistical effects (age)		< 0.0001 ****			0.0002 **			< 0.0001 ****			< 0.0001 ****			0.0156 *			-
