# Supplementary material for: Plant Sterol-Poor Diet Is Associated with Pro-Inflammatory Lipid Mediators in the Murine Brain
Source: Int J Mol Sci. 2021 Dec 8;22(24):13207. doi: 10.3390/ijms222413207 (PMC8707069; doi:10.3390/ijms222413207)
Supplement: Supplementary file 1 [file ijms-22-13207-s001.zip › Table S7 obob sterol+eicos.xlsx]

## Sheet: Sterols
Table S7. Analyte concentrations of brain regions (cortex, cerebellum, hippocampus, hypothalamus), liver and plasma from male ob/+ and ob/ob mice fed a standard chow diet (SC). Data are expressed as mean±SD. Statistics: one-way ANOVA and Student’s t test with p<0.05*, p<0.01**, p<0.001***, p<0.0001****; not significant (ns); limit of detection (LOD). Campesterols (CA); stigmasterol (ST); sitoster…
Analyte	age	genotype	Cortex			Cerebellum			Hippocampus			Hypothalamus			Liver			Plasma			statistical effects (brain)
CA§	16	ob/+	8.3	±	0.2	10.4	±	1.1	8.2	±	0.2	11.1	±	0.4	10.1	±	3	6.6	±	0	0.0031	**
	16	ob/ob	14	±	0.4	17.1	±	0.4	11.9	±	0.5	18.5	±	1	23.9	±	11	1.7	±	0	< 0.0001	****
	statistical effects (genotype)		< 0.0001 ****			0.0014 **			0.0005 ***			0.0006 ***			0.1631 ns			-
ST§	16	ob/+	6.6	±	0.3	2.6	±	0.1	4	±	0.3	3.1	±	0.3	<LOD			0.1	±	0	< 0.0001	****
	16	ob/ob	5.1	±	0.4	2.5	±	0.1	3.2	±	0	2.8	±	0.3	1	±	0.5	0.1	±	0	< 0.0001	****
	statistical effects (genotype)		0.0091 **			0.6526 ns			0.0230 *			0.3554 ns			0.2169 ns			-
SI§	16	ob/+	1.3	±	0.7	1.5	±	0.1	1.2	±	0.1	2.2	±	0.1	4.2	±	1.2	2.7	±	0	0.0881	ns
	16	ob/ob	2	±	0	2.7	±	0.3	2.1	±	0.2	3	±	0	6.6	±	3.2	1	±	0	0.0008	***
	statistical effects (genotype)		0.2537 ns			0.0058 **			0.0039 **			0.0009 ***			0.3628 ns			-
BR§	16	ob/+	3.09	±	0.1	1.82	±	0.15	2.53	±	0.2	2.35	±	0.21	<LOD			0.13	±	0	0.0006	***
	16	ob/ob	2.41	±	0.26	2.05	±	0.25	2.31	±	0.24	1.79	±	0.1	<LOD			0.06	±	0.01	0.0855	ns
	statistical effects (genotype)		0.0247 *			0.3187 ns			0.3769 ns			0.0289 *			-			-
LA§	16	ob/+	3.8	±	0.2	2.6	±	0.2	2.6	±	0.1	3.1	±	0.1	1.7	±	0	0.07	±	0	0.0004	***
	16	ob/ob	2.6	±	0.1	1.8	±	0	1.9	±	0.1	1.9	±	0	2.5	±	1	0.11	±	0	< 0.0001	****
	statistical effects (genotype)		0.0023 **			0.0050 **			0.0004 ***			0.0005 ***			0.3337 ns			-
DE§	16	ob/+	51.3	±	2	35	±	4.6	58	±	1.1	62.9	±	0.5	1.1	±	0.4	0.3	±	0	0.0002	***
	16	ob/ob	45.5	±	1.6	29.9	±	0.5	52.5	±	2	61	±	0.8	0.8	±	0.1	0.4	±	0	< 0.0001	****
	statistical effects (genotype)		0.0332 *			0.1906 ns			0.0261 *			0.6167 ns			0.2955 ns			-
CH§	16	ob/+	9747	±	97	10480	±	1311	9057	±	125	12800	±	816	836	±	175	302	±	0	0.0065	**
	16	ob/ob	10600	±	424	10900	±	535	8943	±	184	12833	±	124	1021	±	171	189	±	8	< 0.0001	****
	statistical effects (genotype)		0.0502 ns			0.6965 ns			0.5104 ns			0.9572 ns			0.3456 ns ns			-
ARA#	16	ob/+	259	±	9	156	±	7	313	±	2	246	±	76	133	±	16	3506	±	0	0.0207	*
	16	ob/ob	229	±	11	174	±	10	267	±	5	158	±	3	178	±	6	3454	±	0	< 0.0001	****
	statistical effects (genotype)		0.0411 *			0.1074 ns			0.0002 ***			0.1750 ns			0.0225 *			-
TxB2$	16	ob/+	69.5	±	3.8	25.4	±	1.4	93.4	±	4.5	42	±	8.5	24.7	±	6.2	8233	±	0	< 0.0001	****
	16	ob/ob	63.7	±	1.2	31.2	±	3.4	70.7	±	3.1	24.9	±	0.4	15.2	±	2.8	10627	±	0	< 0.0001	****
	statistical effects (genotype)		0.1086 ns			0.0843 ns			0.0041 **			0.0474 *			0.1166 ns			-
PGD2$	16	ob/+	965	±	57	287	±	28	1094	±	23	787	±	234	33.7	±	8.8	<LOD			0.0005	***
	16	ob/ob	1097	±	63	426	±	40	1022	±	1	504	±	33	23.3	±	6	<LOD			< 0.0001	****
	statistical effects (genotype)		0.0934 ns			0.0154 *			0.0108 *			0.1663 ns			0.2385 ns			-
§	[ng/mg Tissue / µg/mL Plasma]
#	[pg/mg Tissue / ng/mL Plasma]
$	[fg/mg Tissue / pg/mL Plasma]
