# Supplementary material for: Plant Sterol-Poor Diet Is Associated with Pro-Inflammatory Lipid Mediators in the Murine Brain
Source: Int J Mol Sci. 2021 Dec 8;22(24):13207. doi: 10.3390/ijms222413207 (PMC8707069; doi:10.3390/ijms222413207)
Supplement: Supplementary file 1 [file ijms-22-13207-s001.zip › Table S8 eicos SC.xlsx]

## Sheet: PUFAs-Eicos control
Table S8. Arachidonic acid (ARA) and its derived metabolites thromboxane B2 (TxB2) and prostaglandin D2 (PGD2). Concentrations and ratios of brain regions (cortex, cerebellum, hippocampus, hypothalamus), liver and plasma from male C57BL/6J mice fed a standard chow diet (SC). Data are expressed as mean±SD. Statistics: one-way ANOVA with p<0.05*, p<0.01**, p<0.001***, p<0.0001****; not significant …
Analyte	age	diet	Cortex			Cerebellum			Hippocampus			Hypothalamus			Liver			Plasma			statistical effects (brain)
ARA#	12	SC	275	±	3	210	±	11	315	±	14	285	±	7	162	±	15	3194	±	0	< 0.0001	****
	20	SC	329	±	20	264	±	29	329	±	5	323	±	21	178	±	4	3088	±	53	0.0325	*
	32	SC	277	±	10	194	±	6	277	±	6	198	±	4	200	±	24	3465	±	83	< 0.0001	****
	34	SC	326	±	8	201	±	5	315	±	9	244	±	6	225	±	17	4959	±	0	< 0.0001	****
	36	SC	313	±	3	193	±	9	352	±	48	228	±	7	235	±	4	4124	±	174	0.0007	***
	44	SC	322	±	18	213	±	11	333	±	15	233	±	5	178	±	5	3460	±	141	< 0.0001	****
	statistical effects (age)		0.0018 **			0.1257 ns			0.0805 ns			< 0.0001 ****			0.001 ***			-
TxB2$	12	SC	70.7	±	3.9	42.7	±	2.6	107	±	1	60	±	2.2	50.7	±	5.6	489	±	0	< 0.0001	****
	20	SC	95	±	9.4	48.7	±	10.9	130	±	6	70.7	±	2.9	44.3	±	5.6	1088	±	16	< 0.0001	****
	32	SC	92	±	7.5	35	±	3.7	91.7	±	0.5	43.3	±	2.6	93.7	±	11.3	867	±	73	< 0.0001	****
	34	SC	104	±	2	36	±	4.3	140	±	5	70	±	1.6	102	±	13	1231	±	0	< 0.0001	****
	36	SC	105	±	6	41	±	2.9	132	±	5	61.3	±	4.5	102	±	16	951	±	63	< 0.0001	****
	44	SC	87.3	±	6.8	43.7	±	2.1	97.7	±	7.4	53	±	2.8	43.7	±	4.8	682	±	11	< 0.0001	****
	statistical effects (age)		0.0017 **			0.1831 ns			< 0.0001 ****			< 0.0001 ****			< 0.0001 ****			-
ration TxB2 to ARA	12	SC	0.26	±	0.01	0.2	±	0.01	0.34	±	0.02	0.21	±	0	0.31	±	0.02	0.15	±	0	< 0.0001	****
	20	SC	0.29	±	0.02	0.18	±	0.02	0.4	±	0.02	0.22	±	0.02	0.25	±	0.04	0.35	±	0	< 0.0001	****
	32	SC	0.33	±	0.02	0.18	±	0.01	0.33	±	0.01	0.22	±	0.01	0.47	±	0.06	0.25	±	0.02	< 0.0001	****
	34	SC	0.32	±	0.01	0.18	±	0.02	0.45	±	0.03	0.29	±	0.01	0.45	±	0.03	0.25	±	0	< 0.0001	****
	36	SC	0.34	±	0.02	0.21	±	0.01	0.38	±	0.04	0.27	±	0.03	0.43	±	0.06	0.23	±	0.01	0.0009	***
	44	SC	0.27	±	0.01	0.21	±	0.01	0.29	±	0.01	0.23	±	0.01	0.24	±	0.02	0.2	±	0.01	< 0.0001	****
	statistical effects (age)		0.0007 ***			0.0924 ns			0.0004 ***			0.0025 **			0.0003 ***
PGD2$	12	SC	1396	±	49	836	±	54	1437	±	126	1052	±	109	56.7	±	12.3	<LOD			0.0005	***
	20	SC	2603	±	237	918	±	65	2071	±	99	994	±	100	82.7	±	1.9	<LOD			< 0.0001	****
	32	SC	2135	±	124	766	±	20	1599	±	45	865	±	71	105	±	15.7	<LOD			< 0.0001	****
	34	SC	2283	±	143	685	±	24	2167	±	28	1027	±	62	104	±	3.3	<LOD			< 0.0001	****
	36	SC	2385	±	120	666	±	62	1648	±	165	906	±	125	106	±	13.1	<LOD			< 0.0001	****
	44	SC	1715	±	94	798	±	49	1362	±	68	957	±	53	58.7	±	4.7	<LOD			< 0.0001	****
	statistical effects (age)		< 0.0001 ****			0.0021 **			< 0.0001 ****			0.3459 ns			0.0004 ***			-
ratio PGD2 to ARA	12	SC	5.1	±	0.1	4	±	0.2	4.6	±	0.6	3.7	±	0.4	0.35	±	0.04				0.0251	*
	20	SC	7.9	±	0.9	3.5	±	0.2	6.3	±	0.2	3.1	±	0.5	0.46	±	0.02				< 0.0001	****
	32	SC	7.7	±	0.3	4	±	0.2	5.8	±	0	4.4	±	0.3	0.52	±	0.04				< 0.0001	****
	34	SC	7	±	0.4	3.4	±	0.1	6.9	±	0.3	4.2	±	0.3	0.46	±	0.02				< 0.0001	****
	36	SC	7.6	±	0.4	3.4	±	0.2	4.8	±	1	4	±	0.4	0.45	±	0.05				0.0005	***
	44	SC	5.3	±	0.4	3.7	±	0.2	4.1	±	0	4.1	±	0.2	0.33	±	0.02				0.0008	***
	statistical effects (age)		0.0002 ***			0.0075 **			0.0008 ***			0.0462 *			0.0006 ***
#	[pg/mg Tissue / ng/mL Plasma]
$	[fg/mg Tissue / pg/mL Plasma]
