# Supplementary material for: Plant Sterol-Poor Diet Is Associated with Pro-Inflammatory Lipid Mediators in the Murine Brain
Source: Int J Mol Sci. 2021 Dec 8;22(24):13207. doi: 10.3390/ijms222413207 (PMC8707069; doi:10.3390/ijms222413207)
Supplement: Supplementary file 1 [file ijms-22-13207-s001.zip › Table S9 eicos HF+SC.xlsx]

## Sheet: PUFAs-Eicos intervention
Table S9. Arachidonic acid (ARA) and its derived metabolites thromboxane B2 (TxB2) and prostaglandin D2 (PGD2). Concentrations and ratios of brain structures (cortex, cerebellum, hippocampus, hypothalamus), liver and plasma from male C57BL/6J mice fed a coconut oil-based high-fat (HF) diet from age 8 to 32 weeks followed by a standard chow diet (SC) from age 32 to 44 weeks. Data are expressed as …
Analyte	age	diet	Cortex			Cerebellum			Hippocampus			Hypothalamus			Liver			Plasma			statistical effects (brain)
ARA#	12	HF	402	±	14	198	±	7	476	±	17	298	±	12	165	±	10	2778	±	0	< 0.0001	****
	20	HF	346	±	24	285	±	89	438	±	53	316	±	61	186	±	16	2722	±	25	0.1506	ns
	32	HF	304	±	11	198	±	3	280	±	5	205	±	6	256	±	11	3668	±	120	< 0.0001	****
	34	SC	298	±	15	241	±	76	324	±	12	234	±	5	287	±	29	4759	±	76	< 0.0001	****
	36	SC	296	±	52	226	±	8	379	±	42	272	±	26	254	±	14	3622	±	23	0.0167	*
	44	SC	298	±	11	209	±	8	334	±	7	248	±	18	236	±	35	5132	±	1624	< 0.0001	****
	statistical effects (age)		0.0067 **			0.1573 ns			0.0002 ***			0.0205 *			0.0008 ***			-
TxB2$	12	HF	107	±	10	38.3	±	0.9	161	±	13	78	±	4.1	59	±	11.3	739	±	0	< 0.0001	****
	20	HF	119	±	7	57.3	±	18	168	±	20	67.3	±	8.5	54.3	±	3.7	562	±	3	0.0002	***
	32	HF	96.7	±	8.7	41	±	1.4	87.7	±	2.4	38.7	±	3.3	128	±	41.2	1668	±	97	< 0.0001	****
	34	SC	108	±	6	53.3	±	17.7	135	±	11	60.7	±	0.5	97.7	±	39.4	291	±	9	0.0002	***
	36	SC	87	±	19	48	±	8.3	136	±	1	65	±	12.1	60.3	±	14.4	722	±	44	0.0004	***
	44	SC	102	±	3	48.3	±	0.9	87.7	±	2.6	64.7	±	5.8	56.3	±	8	1593	±	199	< 0.0001	****
	statistical effects (age)		0.1166 ns			0.529 ns			< 0.0001 ****			0.0024 **			0.0571 ns			-
ratio TxB2 to ARA	12	HF	0.27	±	0.02	0.19	±	0.01	0.34	±	0.04	0.26	±	0.01	0.36	±	0.09	0.27	±	0	0.001	**
	20	HF	0.34	±	0.01	0.2	±	0.02	0.38	±	0	0.22	±	0.03	0.29	±	0.01	0.2	±	0	< 0.0001	****
	32	HF	0.32	±	0.02	0.21	±	0.01	0.31	±	0.01	0.19	±	0.01	0.5	±	0.16	0.45	±	0.01	< 0.0001	****
	34	SC	0.36	±	0	0.32	±	0.15	0.42	±	0.05	0.26	±	0.01	0.34	±	0.12	0.06	±	0	0.2951	ns
	36	SC	0.29	±	0.02	0.21	±	0.03	0.36	±	0.04	0.24	±	0.03	0.24	±	0.05	0.2	±	0.01	0.0049	**
	44	SC	0.34	±	0	0.23	±	0	0.26	±	0.01	0.26	±	0.01	0.24	±	0.05	0.33	±	0.06	< 0.0001	****
	statistical effects (age)		0.0001 ***			0.3741 ns			0.0033 **			0.0129 *			0.1215 ns
PGD2$	12	HF	1577	±	250	492	±	14	1117	±	178	834	±	59	68.3	±	2.4	<LOD			0.0007	***
	20	HF	2905	±	379	1045	±	244	2523	±	245	922	±	34	97	±	16.5	<LOD			< 0.0001	****
	32	HF	2090	±	161	838	±	6	1514	±	120	722	±	64	150	±	39	<LOD			< 0.0001	****
	34	SC	2144	±	107	746	±	87	1927	±	225	860	±	38	142	±	74	<LOD			< 0.0001	****
	36	SC	1562	±	190	679	±	6	1453	±	17	762	±	37	91.7	±	21.5	<LOD			< 0.0001	****
	44	SC	2166	±	39	851	±	34	1195	±	44	1117	±	69	91	±	15	<LOD			< 0.0001	****
	statistical effects (age)		0.0005 ***			0.0051 **			< 0.0001 ****			< 0.0001 ****			0.2491 ns			-
ratio PGD2 to ARA	12	HF	3.9	±	0.5	2.5	±	0.15	2.4	±	0.5	2.8	±	0.16	0.42	±	0.03				0.0095	**
	20	HF	8.4	±	0.5	3.8	±	0.4	5.8	±	0.2	3	±	0.61	0.52	±	0.07				< 0.0001	****
	32	HF	6.9	±	0.5	4.2	±	0.08	5.4	±	0.4	3.5	±	0.22	0.58	±	0.14				< 0.0001	****
	34	SC	7.2	±	0.1	4.3	±	0.61	5.9	±	0.6	3.7	±	0.1	0.49	±	0.22				0.0002	***
	36	SC	5.3	±	0.3	3	±	0.08	3.9	±	0.4	2.8	±	0.16	0.36	±	0.07				< 0.0001	****
	44	SC	7.3	±	0.2	4.1	±	0.14	3.6	±	0.2	4.5	±	0.06	0.39	±	0.08				< 0.0001	****
	statistical effects (age)		< 0.0001 ****			0.0003 ***			< 0.0001 ****			0.0004 ***			0.4473 ns
#	[pg/mg Tissue / ng/mL Plasma]
$	[fg/mg Tissue / pg/mL Plasma]
